# Supplementary material
Source: HighWire-hosted journal article supplement (doi:10.1101/rna.030916.111)
Supplement: SuppFigLegend.docx [file SuppFigLegend.docx]

## Supplementary Figure 1 - Effect of normalization on K - data distribution

A: MA-plots before and after applying different normalization schemes on K-data described in the text (Kuchen et al. 2010). Except the raw data plot, in all the other MA-plots, black circles are data before normalization, and red circles are after normalization. B: box plots list the transformed log 2 counts in the treatment condition after normalization (except raw data) separated by quartiles: Q1, Q2, Q3 and Q4. Q1 is the lowest quartile and Q4 is the highest quartile. The color codes for box plots from left to right are: black (raw data), blue (global normalization), purple (lowess normalization), brown (TMM normalization), orange (scaling normalization), gray (quantile normalization), green (VSN normalization) and red (invariant normalization).
